# Supplementary material
Source: publisher site journal article supplement (https://www.spandidos-publications.com/8704/downloadSupplementary)

Figure S1. Standard curve of astragaloside IV measured by vanillin-sulfuric acid colorimetric method at 560 nm. The regression equation is  $y=0.0551x+0.0774$  ( $R^2=0.985$ ). The content of astragaloside IV in the samples was calculated using the following formula: Content of total astragaloside In samples= $[(y-y_{\text{blank}}-0.0774)/0.0551]$ /concentration of compound total glycosides (x100%).

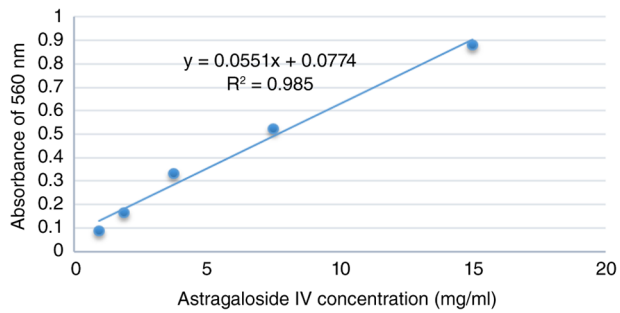

Supplement: Supplementary file 1 [file downloadSupplementary]
